1 **Dataset-specific thresholds significantly improve detection of low transcribed regulatory**  
2 **genes in polysome profiling experiments**

3

4 Igor V. Deyneko<sup>1\*</sup>, Orkhan N. Mustafaev<sup>2</sup>, Alexander A. Tyurin<sup>1</sup>, Ksenya V. Zhukova<sup>1</sup> and Irina V.

5 Goldenkova-Pavlova<sup>1\*</sup>

6 <sup>1</sup>K.A. Timiryazev Institute of Plant Physiology RAS, IPP RAS, Moscow, Russia

7 <sup>2</sup>Genetic Resources Institute, Azerbaijan National Academy of Sciences, Baku, Azerbaijan

8 \*Corresponding authors

9 E-mail: igor.deyneko@inbox.ru (IVD), irengold58@gmail.com (IVG-P)

10

11 *Running title: Dataset-specific thresholds*

12 **Keywords:** RNA-seq, polysome profiling, data cleaning, data analysis; translation.

13

14

15    **Abstract**

16    **Motivation:** Polysome profiling is novel, and yet has proved to be an effective approach to detect  
17    mRNAs with differential ribosomal load and explore the regulatory mechanisms driving efficient  
18    translation. Genes encoding regulatory proteins, having a great influence of the organism, usually reveal  
19    moderate to low transcriptional levels, compared, for example, to genes of house-keeping machinery.  
20    This complicates the reliable detection of such genes in the presence of technical and/or biological  
21    noise.

22    **Results:** In this work we investigate how cleaning of polysome profiling data on *Arabidopsis thaliana*  
23    influences the ability to detect genes with low level of total mRNA, but with a highly differential  
24    ribosomal load, i.e. genes translationally active. Suggested data modelling approach to identify a  
25    background level of mRNA counts individually for each dataset, shows higher power in detection of low  
26    transcribed genes, compared to the use of thresholds for the minimal required mRNA counts or the use  
27    of raw data. The significant increase in detected number of regulation–related genes was demonstrated.  
28    The described approach is applicable to a wide variety of RNA-seq data. All identified and classified  
29    mRNAs with high and low translation status are made available in supplementary material.

30

31

32

## 33 **1. Introduction**

34 Investigation of the mechanisms underlying differential gene expression is one of the fundamental tasks  
35 in understanding the functional organization of genomes and their dynamic properties. To date, most  
36 attention has been focused on the stage of transcriptional regulation, partly due to the relative  
37 simplicity and the variety of established experimental techniques. From another side, there is a growing  
38 number of studies showing a large discrepancy between levels of transcription and the levels of the  
39 target proteins, suggesting the importance of the intermediate steps like the regulation of translation  
40 (also called ‘translational buffering’) [1-3]. One of the most fascinating studies shows that fluctuations in  
41 transcriptomes do not necessarily lead to changes in the protein levels [1]. This discrepancy is mainly  
42 attributed to the active regulation of translation. The rise of novel experimental techniques such as  
43 polysome profiling and ribosome profiling [4] forms a solid ground for deciphering such regulation. The  
44 basic idea behind all of these techniques is to separate mRNA in a quiet state (monosomal fraction) and  
45 active state, i.e. mRNA heavily loaded with ribosomes (polysomal fraction), followed by sequencing or  
46 hybridizing on chips [3]. The resulting quantitative measure of translational state allows a better  
47 correlation of the number of mRNA transcripts and the observed protein levels [5]. Additionally, such  
48 data can be used to investigate regulatory mechanisms of the observed differential translation.

49 There are a number of programs used for analysis of ribosome sequencing data, most of which were  
50 originally developed for the analysis of gene transcription [6-8]. The major problem of the mathematical  
51 methods behind these programs is the estimation of the variance, that is the key point for the  
52 calculation of the statistical significance of the observed differences. Estimation of the variance of the  
53 measured expression values can be based on variations between replicates or in more advanced  
54 approaches, on genes from the same replicate with similar absolute expression [7]. This allows having  
55 even a single sample to estimate gene expression variance and then a statistical significance of  
56 differences between genes.

57 Some programs were specifically developed for analysis of polysome and ribosome profiling  
58 experiments, which are usually designed to measure polysomal and total mRNA fractions. Programs like

59 anota2seq [9] or RiboDiff [10] can directly adjust their mathematical models for the changes in total  
60 level of transcription. The idea behind anota2seq is to pool genes with similar transcription to increase  
61 statistical power using the generalization of random variance model [11], when the number of replicates  
62 is not sufficient.

63 Still, there are other factors, apart from variability, affecting statistical calculations, such as outliers and  
64 noise, that cannot be fully considered by these programs. The problem of removing the noise and the  
65 selection of the “correct” threshold for minimal value of mRNA count is very controversial, and there is  
66 no agreement on this in the bioinformatics community. In anota2seq [9] RNA counts equal to zero are  
67 automatically removed. DESeq2 [7] performs independent filtering by default using the mean of  
68 normalized counts as filter statistics. Software Corset [12] filters any transcripts with fewer than ten  
69 reads by default and in the analysis of microRNAs, it was suggested to set the threshold to 32 reads [13].

70 In this work it is suggested to define a threshold for the minimal required mRNA count based on the  
71 analysis of the investigated datasets. We demonstrate that this approach is more effective, compared to  
72 universal, pre-defined thresholds, especially in searching genes with low transcription, *i.e.* with low  
73 values of the measured mRNA counts. This approach can also be used for the analysis of transcriptome  
74 RNA-seq data and the idea of data modelling can be applied to any suitable dataset.

75

## 76 **2. Materials and Methods**

### 77 *2.1. Plant material*

78 Plants of *A. thaliana* type Columbia-0 were grown at 22°C, 12h lighting period, light intensity of 100  
79  $\mu\text{mol}\cdot\text{m}^{-2}\cdot\text{s}^{-1}$  and sampled on the stage of third rosette leaf (approx. 28 days). Three independent  
80 samples were prepared.

### 81 *2.2. Preparation of monosomal, polysomal and total mRNA fractions*

82 Plant material (leaves) was homogenized in a buffer containing 0.2 M Tris pH 9.0, 0.2 M KCl, 0.025 M  
83 EGTA, 0.035 M MgCl<sub>2</sub>, 1% DOC, 1% Triton, 5 mM DTT, 50 mg/ml cycloheximide, 50 mg/ml  
84 chloramphenicol. Cell extracts were applied over 5 ml of a 15-60% (W/v) sucrose gradient and  
85 centrifuged at 237000g for 1.5 hours at 4 ° C. Fractions with a volume of 400 µl were taken manually.  
86 Total RNA was extracted from each fraction using the ExtractRNA kit (Evrogen, Russia). In each fraction,  
87 the RNA content was evaluated using a Nanodrop ND-1000 instrument (LabTech International, UK).  
88 Total cytosolic RNA was isolated from the part of the cell extract before loading onto the sucrose  
89 gradient. RNA was extracted using the ExtractRNA kit (Evrogen, Russia), the quality and quantity of  
90 preparations of total RNA and RNA from polysomal and monosomal fractions of plants was evaluated on  
91 an Agilent Bioanalyzer 2100. More detailed description of the protocol can be found in [14]. Altogether,  
92 nine samples were prepared for sequencing.

### 93 *2.3. Preparation of RNA samples, sequencing, assembling and mapping*

94 RNA libraries were prepared with TruSeq Stranded mRNA Sample Prep Kit (Illumina), quality control  
95 were performed on Agilent Bioanalyzer 2100 and by qPCR. Sequencing was done on Illumina HiSeq 4000  
96 (101 cycle, paired end) with HiSeq 4000 sequencing kit version 1. FASTQ files were filtered to remove  
97 adapters, low-quality reads and reads with more than 10% mismatches.

### 98 *2.4. Statistical analysis*

99 All statistical calculations were done in R [15] and MS Excel. Statistical difference between polysomal  
100 and monosomal fractions were calculated using edgeR version 3.24.3 with default arguments [6]. Fitting  
101 the exponential model was done using  $\text{lm}(\log(\#mRNAs) \sim \text{mRNA\_count})$  function in R. Differences in  
102 functional classifications are evaluated using binomial test. Genomic sequences were downloaded from  
103 EnsemblPlants (<http://plants.ensembl.org/index.html>) and processed using Perl scripts. Gene ontology  
104 analysis was performed using DAVID [16] and PANTHER v.14.0 [17].

105

106

## 107 **3. Results and Discussion**

### 108 *3.1 Polysome profiling experiment*

109 Protein production is a multistep process including transcription, transport, mRNA maturation,  
110 translation and final protein modifications. One way to study the regulation of translation is to measure  
111 the differential ribosomal load by polysome profiling [4]. Briefly, the method consists in mRNA  
112 extraction, separation in sucrose gradient into mRNA fractions with high (polysomal fraction) and low  
113 (monosomal fraction) ribosomal load [18]. mRNA released from ribosomes is sequenced, reads are  
114 mapped to the genome, count values for mRNA are calculated and analyzed with programs like DESeq2  
115 or edgeR [6, 7], designed for differential analysis of NGS data and available as R [15] packages.

116 In this work, in addition to classical polysome profiling experiment design, the measurement of total  
117 cytosolic mRNA was also included. It was based on considerations, that mechanisms of translational  
118 regulation may be different in classes of abundant and rare mRNAs. Indeed, the regulation of rare mRNA  
119 is thought to be very sensitive, as for example, for genes encoding regulatory factors, where from a few  
120 mRNA copies many protein molecules can be produced via intensive translation. Taking into account the  
121 possible variety of the gene regulatory mechanisms on stages of transcription and translation, it seems  
122 necessary to be able to isolate groups of mRNAs similar not only by translational status, but also by  
123 transcriptional. Altogether, our experiment consists of measuring the levels of mRNAs in polysome,  
124 monosome and total cytosolic mRNA fractions, each performed in three replicates (Figure 1).

125 **Figure 1. Schematic representation of the experimental design.**

126

### 127 *3.2 Modelling the raw data*

128 Raw RNA counts coming from sequencing represent the amount of RNA found in the sample. In total  
129 610M reads and 89G bases were sequenced, which were mapped to 37336 different mRNAs on the  
130 TAIR10 genome. Let  $N_{f,i}$  be the number of reads for mRNA  $i = 1, \dots, 37336$  in fraction  $f=(polysome,$   
131  $monosome, total)$ , averaged over the three replicates. Figure 2 represents the number of mRNAs with

132 respect to their counts ( $N_{f,i}$ ). It is interesting to observe a very high number of mRNAs with close to one  
133 counts, which decays as count number increases. Usually these small counts are regarded as noise and  
134 mRNAs with counts less than some predefined values are removed [7, 12, 13]. Here we suggest modelling  
135 the data distributions and to find exact values which should be subtracted from the raw values.

136 Overall, the distributions have two local maxima – one is around one and the other is around 3400  
137 counts for total RNA fraction (2800 and 2500 for monosomal and polysomal fractions). One can speculate  
138 that this curve represents a sum of two independent processes, one is exponentially distributed and the  
139 other distributed negative binomially. The former can be interpreted as a background noise, which usually  
140 decay exponentially [19], and may originate from DNA debris, reverse transcription or sequencing  
141 artefacts. The latter is a real signal that has negative binomial distribution [20]. Formally this can be  
142 represented as a sum of two independent random variables, one following negative binomial distribution  
143 and the other exponential:

$$144 \quad N_{f,i,r} = \alpha + \gamma. \quad \alpha \in NB(r,p), \gamma \in Exp(\lambda).$$

145

146 In other words, it is assumed that every measured mRNA count value contains real and random parts.  
147 It is not possible to decompose each value of mRNA count into two components due to the random nature  
148 of the process, but one can estimate the maximum contribution of the exponential part and then subtract  
149 it from the raw value. It is possible, because the contribution of the binomial part with its peak around  
150 3000 is negligible at low values, therefore it will be assumed that points with very low values are of pure  
151 random nature.

152 The exponent distribution has one parameter and can be found by fitting the exponential model into  
153 data below ten counts (first several points on the red curve, fig. 2). Having built the exponential model  
154 (grey dashed curve, fig.2), one can extrapolate the curve to the point where the exponent drops to some  
155 acceptably low value, or in other words, solve for  $m$  the equation  $e^{-\alpha m} = 10^{-3}$ , where  $\alpha$  is the estimated  
156 decay parameter. For example, the exponent equals  $10^{-3}$  when mRNA count equals 24 for total mRNA  
157 fraction. That means, that one mRNA out of thousand with the count value of 24 is expected to appear by  
158 chance. The value of 24 can be used as a threshold for the minimal required counts instead of pre-defined

159 threshold [7, 12, 13]. But following our logic, that the observed counts consist of two independent  
160 components, this value should be subtracted from all raw mRNA count values to maximally exclude  
161 possible random effect. If the resulting value is negative, a zero value is assigned:

$$162 \quad N_{f,i,r} = \begin{cases} N_{f,i,r} - 24, & \text{if } \geq 0 \\ 0, & \text{else} \end{cases}, \quad (1)$$

163 The distribution of the cleaned data is now very close to negative binomial distribution as it is usually  
164 assumed [6, 21] (blue curves, fig. 2). Overall, the three datasets of total, monosomal and polysomal  
165 fractions were modified by subtracting 24, 16 and 28 from each mRNA count respectively. So for  
166 example, if mRNA for a transmembrane protein gene AT3G55790 has 95 raw counts in first repetition of  
167 total mRNA fraction, then  $95-24=71$  counts will be the cleaned count value for that gene. After cleaning,  
168 mRNAs with all zero counts were removed, resulting in 23102 mRNAs out of 37336 in the raw data.

169 **Figure 2.** Distribution of mRNAs according to mRNA counts. These graphs show how many  
170 mRNAs have specified number of counts (empirical distributions, red curves) and its approximation by  
171 the exponent in the area of low values (grey dashed curves). Data, cleaned by subtraction the specified  
172 count value from every mRNA, is shown by the blue curves. The cleaned data is very close to negative  
173 binomial distribution (black curves). Graphs represent A) total B) monosomal C) polysomal mRNA  
174 fractions.

175

176 Evidently, this transformation mainly affects mRNAs with low counts and have no or minor  
177 effect on highly transcribed mRNAs. In the next section, the advantage of data-specific thresholds and  
178 the suggested data modification will be shown for detection of genes with regulatory function.

179

180

181



182 *3.3 Detection of signal transduction and regulatory related genes is sensitive to the data cleaning*  
183 *procedure.*

184 Genes encoding regulatory proteins, including so-called master regulator genes [22], have a great  
185 influence on the organism development and represent the key elements in response to external and  
186 internal signals. Usually such genes reveal low to moderate transcriptional levels [23, 24] compared, for  
187 example, to genes of house-keeping machinery or structural genes. Still, such genes are actively  
188 transcriptionally regulated and assuming moderate absolute transcriptional levels, it may become  
189 difficult to differentiate between real changes in expression and random fluctuations. In this section we  
190 investigate if an accurate data cleaning step may assist the detection of such genes.

191 Here we are interested in detection of genes with low to moderate transcriptional, but high translational  
192 status, i.e. genes whose few mRNA copies intensively produce protein products. The criterion for the  
193 definition of such genes will be as follows:

- 194 • mRNA counts for gene  $i$  in total fraction is lower 300 ( $N_{\text{total},i} \leq 300$ , 7945 genes out of 23102);
- 195 • logarithm of the ratio of mRNA counts in polysomal and monosomal fractions is greater 1.5:  
196  $\log_2(N_{\text{polysomal},i}/N_{\text{monosomal},i}) \geq 1.5$ ;
- 197 • significance (p-value) of the difference between polysomal and monosomal fractions identified  
198 by edgeR  $\leq 10^{-4}$ .

199  
200 This criterion was applied to three datasets – raw data, data cleaned by setting a threshold for minimal  
201 accountable mRNA counts (24, 16 and 28 counts for total, monosomal and polysomal fractions  
202 respectively), and data cleaned by subtraction of the maximal “noise contributions” from the all mRNA  
203 counts (formula 1). The resulted gene lists were analyzed for functional annotation using DAVID [16] for  
204 the term “signal”. The keyword “signal” was selected, because it comprises genes involved in signaling  
205 pathways, like cytokines, gibberellin, auxin and ethylene signaling pathways regulating many aspects of

206 plant growth and development including seed germination, stem and leaves, flower, pollen and fruit  
207 development *etc.* The results are presented in table 1.

208 It is evident from the table, that the data cleaning step is essential for detection of genes with regulatory  
209 function. The suggested cleaning via subtraction of the “noisy counts” results in detection of more  
210 genes, moreover, the percentage of regulation-related genes has also slightly increased. The results also  
211 support our hypothesis, that regulatory genes tend to show only moderate levels of transcription, but  
212 the most significant overrepresentation is observed for the data cleaned by subtraction (table 1).

213 Comparison of the identified gene sets revealed 122 genes found only using the data cleaned by  
214 subtraction, 72 genes found only by raw data and 155 genes found by both (gene lists are available in  
215 supplementary material). Focusing on genes annotated with “signal” term the corresponding numbers  
216 will be 39, 18, 56 (cleaned, raw and both datasets). This demonstrates, that the data cleaning procedure  
217 objectively extends the number of identified genes of interest. For example, there are such genes like  
218 root meristem growth factor (RGF3, AT2G04025), embryo-specific protein (ATS3, AT5G62210),  
219 transmembrane protein (DUF1191, AT4G23720) and many others directly related to gene regulation and  
220 signal transduction, all found exclusively after the suggested data cleaning.

221 It is interesting to note, that the commonly accepted approach to remove mRNA with counts below  
222 some pre-defined threshold leads to significantly fewer genes even compared to the raw data (table 1)  
223 and therefore, it was not used in the above comparisons. We also do not apply conventional pre-  
224 selected thresholds for the counts for the following reasons. First, the variation of those is quite  
225 significant and ranges from just a few in most studies [7, 9] to 32 counts [13] and the reasoning for  
226 preferring one to another is not evident. Second, even application of data-specific thresholds in the  
227 range of 16-28 led to significant reduction in number of identified genes, making this way of data  
228 cleaning ineffective. Programs like EdgeR or DESeq2 already have a built-in noise reduction logic, which  
229 probably makes the use of fixed thresholds unnecessary.

230 Another discussion point is the exponent estimation and how many data points should be included in  
231 more general cases. It can be suggested to use a local minimum in the area of small RNA counts as a last

232 point. On the graph for total and monosomal fractions (fig. 2) this selection is quite evident. In contrast,  
233 data in polysomal mRNA fraction have greater variation, which objectively allows less exact estimation  
234 of parameters. Our investigation shows that as small as four points are sufficient to estimate the  
235 parameters of the exponent.

236 Overall, data modelling allows identifying characteristics of exponential distribution and thereby to  
237 exclude possible noise from the measured mRNA counts. Such data modification allows to fine-tune the  
238 conventional search algorithms, especially when genes with moderate transcriptional levels are in focus.

239

240 **Table 1. Genes with moderate to low transcription and high translation.** Differentially translated genes  
241 were identified using EdgeR in three datasets: raw data, trimmed data and data cleaned by subtraction  
242 (see text for explanation). To limit the search to genes with moderate transcription, only genes with  
243 lower than 300 counts were considered (corresponds to approx. a lower third of all genes).

244 Classification of genes using DAVID were performed to find genes with regulatory potential. Gene lists  
245 are available as supplementary material. Significance values as reported by DAVID.

246

| Modification                  | No of genes identified by the criteria | Number of genes annotated with the term "signal" | % of genes annotated with the term "signal" | Significance         |
|-------------------------------|----------------------------------------|--------------------------------------------------|---------------------------------------------|----------------------|
| <i>Raw counts</i>             | 227                                    | 73                                               | 32.2%                                       | $2.6 \cdot 10^{-16}$ |
| <i>Cleaned by trimming</i>    | 200                                    | 67                                               | 32.5%                                       | $9.7 \cdot 10^{-15}$ |
| <i>Cleaned by subtraction</i> | 277                                    | 95                                               | 34.3%                                       | $1.1 \cdot 10^{-21}$ |

247

248

### 249 3.4. Detailed functional analysis

250 The use of functional classification of genes like Gene Ontology is practical to give a quick overview on  
251 underlying differences in functionality of the investigated genes. Here the resource PANTHER v.14.0 [17]  
252 was used to classify the mRNAs in four datasets. These datasets were compiled using “symmetrical”  
253 criteria to the criterion defined above. Particularly, mRNA are classified according to the level of  
254 transcription into low and high ( $N_{total,i} \leq 300$  and  $N_{total,i} \geq 1200$ , respectively) and according to the level of  
255 translation into monosomal and polysomal mRNAs ( $\log_2(N_{polysomal,i}/N_{monosomal,i}) \leq -1.5$  and  $\geq 1.5$   
256 respectively, in both cases p-value by edgeR  $\leq 10^{-4}$ ). The values of 300 and 1200 for total mRNA were  
257 selected as the lowest and highest 3-quantiles of all genes (7945 and 7846 genes respectively). The four  
258 datasets comprise 330, 444, 277 and 473 genes (high & polysomal, high & monosomal, low & polysomal  
259 and low & monosomal respectively) and are available in the supplementary material.

260 PANTHER classification system is designed to classify genes according to families of evolutionary related  
261 proteins, protein molecular functions, pathways etc. The four datasets were classified according to Gene  
262 Ontology (GO) molecular function and PANTHER protein class categories, the latter is used to  
263 categorize protein families (fig. 3). Classification by GO “molecular function” demonstrate the significant  
264 overrepresentation of genes with molecular function “regulator” (GO:0098772) in the polysomal mRNAs  
265 with low transcription (p-value= $5.89 \cdot 10^{-5}$ , observed 14.5%, expected 3.2%, here and further binomial  
266 test, fig. 3A dark blue slice marked with \*). Genes in this category include, for example, cyclin-B1, root  
267 meristem growth factors, pectinesterase inhibitors. Corresponding category in PANTHER protein class  
268 “gene specific translational regulator” (PC00264) is also overrepresented only in the same mRNA group  
269 (p-value= $2.07 \cdot 10^{-4}$ , observed 11.6%, expected 2.0%, fig. 3B). To regulator-related could also be regarded  
270 genes with a function of molecular transducers (GO:0060089, p-value= $1.87 \cdot 10^{-3}$ , observed 7.3%,  
271 expected 1.6%), which work as compound molecules with one or more regulatory components. Genes  
272 involved in pore formation regulating the transit of other of molecules (transporter activities) are also  
273 overrepresented in low transcribed genes (p-value= $2.64 \cdot 10^{-6}$ , observed 10.9%, expected 2.4%) with no

274 preference to polysomal or monosomal mRNA groups. This particularly may indicate potential active  
275 differential regulation of translation of genes in this group.

276 An interesting exception is the group of “translational regulators” (GO:0045182), which is represented  
277 only in highly transcribed genes, although the significance is only at the moderate level ( $p$ -  
278 value= $8.38 \times 10^{-3}$ , observed 4.6%, expected 1.6%, fig. 3A marked with x). Genes classified into this group  
279 are genes of a close family of eukaryotic translation initiation factors: eIF-2, 4B2, 4B3, 4G and Ts.  
280 Therefore, we may speculate, that high transcription of the above translation initiation factors cannot  
281 be extrapolated on all genes related to regulation of translation, because it is not confirmed by the  
282 “protein class” classification scheme, by which translation related genes are equally distributed among  
283 groups (PC00263, fig. 3B marked with x). The above genes may represent a closely related gene family  
284 with similar transcriptional regulation, that may indeed have high transcriptional levels and is an  
285 exception to the general rule, or it could be just a statistical artefact.

286 **Figure 3.** Functional classification of mRNA depending on transcriptional and translational status.  
287 mRNAs were classified into four groups according to transcriptional and translational levels (see text). A.  
288 Classification using GO “molecular function” demonstrates the significant overrepresentation of genes  
289 with molecular function “regulator” in the mRNA with low transcription and high translation ( $p$ -  
290 value= $5.89 \times 10^{-5}$ , dark blue slice marked with \*). Regulation related “translational regulator” group  
291 shows only moderate significance ( $p$ -value=  $8.38 \times 10^{-3}$ , marked with x) in the group of genes with high  
292 transcription. B. Classification according to “protein class” by PANTHER classification system. Similarly,  
293 transcriptional regulator genes are significantly overrepresented ( $p$ -value= $2.07 \times 10^{-4}$ , green slice marked  
294 with \*). Translational proteins do not reveal any significant biases (dark blue slice marked with x).

295

## 296 **Conclusion**

297 Investigation of regulatory genes is crucial for the understanding of the functioning of any organism, but  
298 the experimental detection of such genes is complicated by the low to moderate levels of their

299 expression and the significant influence of experimental and biological noise. One way to overcome this  
300 is to investigate target genes with strong expression and apply reverse engineering or use databases of  
301 regulatory pathways to find the regulators. Direct methods utilize complex mathematical models to  
302 discern weak signals of regulation.

303 The data cleaning procedure suggested here is assumed not to further complexify the methods, but to  
304 “personalize” parameters, used to dissect noise and real values. The idea consists in defining a  
305 maximum contribution, which could originate from technical or biological noise, with a subsequent  
306 subtraction of that value from the raw measurements. This is different to other approaches, where only  
307 values below some noise threshold are removed and the rest is left intact. As shown in the results, the  
308 suggested cleaning procedure increases the number of detected genes with differential expression.  
309 Moreover, the ratio of genes with regulatory functions is also increased after suggested data cleaning.

310 We believe that data modelling should be used to define dataset-specific thresholds and the use of  
311 “universal” values avoided, since variation caused by experimental settings could be significant. The  
312 polysomal and monosomal fractions in our experiment differs almost twice in the level of the  
313 introduced noise, despite standardized sample preparation and sequencing procedures. The suggested  
314 in the literature threshold values cover a very broad range, so the selection of a particular threshold to  
315 our view needs transparent justification, no matter if they are used to trim the low values or to clean  
316 the data as suggested here.

317 Finally, the suggested experimental design to measure three mRNA fractions allows investigation of  
318 both quiet and highly translated mRNA, since the investigation of potential mechanisms of translational  
319 repression are of the same importance as mechanisms of activation. Understanding of both will provide  
320 the complete picture of translational regulation.

321

322 **Funding:** This research was funded by the Russian Science Foundation (grant no. 18-14-00026).

323 **Acknowledgments:** We are grateful Dr. Charles Latting for thorough English editing.



## 325 **References**

- 326 1. Baerenfaller K, Grossmann J, Grobei MA, Hull R, Hirsch-Hoffmann M, Yalovsky S, et al. Genome-  
327 scale proteomics reveals Arabidopsis thaliana gene models and proteome dynamics. *Science*.  
328 2008;320(5878):938-41. Epub 2008/04/26. doi: 10.1126/science.1157956. PubMed PMID: 18436743.
- 329 2. Yanguéz E, Castro-Sanz AB, Fernández-Bautista N, Oliveros JC, Castellano MM. Analysis of  
330 genome-wide changes in the translome of Arabidopsis seedlings subjected to heat stress. *PLoS One*.  
331 2013;8(8):e71425. Epub 2013/08/27. doi: 10.1371/journal.pone.0071425. PubMed PMID: 23977042;  
332 PubMed Central PMCID: PMC3747205.
- 333 3. Yamasaki S, Matsuura H, Demura T, Kato K. Changes in Polysome Association of mRNA  
334 Throughout Growth and Development in Arabidopsis thaliana. *Plant Cell Physiol*. 2015;56(11):2169-80.  
335 Epub 2015/09/29. doi: 10.1093/pcp/pcv133. PubMed PMID: 26412777.
- 336 4. Goldenkova-Pavlova IV, Pavlenko OS, Mustafaev ON, Deyneko IV, Kabardaeva KV, Tyurin AA.  
337 Computational and Experimental Tools to Monitor the Changes in Translation Efficiency of Plant mRNA  
338 on a Genome-Wide Scale: Advantages, Limitations, and Solutions. *Int J Mol Sci*. 2018;20(1). Epub  
339 2018/12/24. doi: 10.3390/ijms20010033. PubMed PMID: 30577638; PubMed Central PMCID:  
340 PMCPMC6337405.
- 341 5. Merchante C, Stepanova AN, Alonso JM. Translation regulation in plants: an interesting past, an  
342 exciting present and a promising future. *Plant J*. 2017;90(4):628-53. Epub 2017/03/01. doi:  
343 10.1111/tpj.13520. PubMed PMID: 28244193.
- 344 6. Robinson MD, McCarthy DJ, Smyth GK. edgeR: a Bioconductor package for differential  
345 expression analysis of digital gene expression data. *Bioinformatics*. 2010;26(1):139-40. Epub  
346 2009/11/17. doi: 10.1093/bioinformatics/btp616. PubMed PMID: 19910308; PubMed Central PMCID:  
347 PMCPMC2796818.
- 348 7. Love MI, Huber W, Anders S. Moderated estimation of fold change and dispersion for RNA-seq  
349 data with DESeq2. *Genome Biol*. 2014;15(12):550. Epub 2014/12/18. doi: 10.1186/s13059-014-0550-8.  
350 PubMed PMID: 25516281; PubMed Central PMCID: PMCPMC4302049.



- 351 8. Wang L, Feng Z, Wang X, Wang X, Zhang X. DEGseq: an R package for identifying differentially  
352 expressed genes from RNA-seq data. *Bioinformatics*. 2010;26(1):136-8. Epub 2009/10/27. doi:  
353 10.1093/bioinformatics/btp612. PubMed PMID: 19855105.
- 354 9. Oertlin C, Lorent J, Murie C, Furic L, Topisirovic I, Larsson O. Generally applicable transcriptome-  
355 wide analysis of translation using anota2seq. *Nucleic Acids Res*. 2019;47(12):e70. Epub 2019/03/31. doi:  
356 10.1093/nar/gkz223. PubMed PMID: 30926999; PubMed Central PMCID: PMC6614820.
- 357 10. Zhong Y, Karaletsos T, Drewe P, Sreedharan VT, Kuo D, Singh K, et al. RiboDiff: detecting changes  
358 of mRNA translation efficiency from ribosome footprints. *Bioinformatics*. 2017;33(1):139-41. Epub  
359 2016/09/17. doi: 10.1093/bioinformatics/btw585. PubMed PMID: 27634950; PubMed Central PMCID:  
360 PMC5198522.
- 361 11. Wright GW, Simon RM. A random variance model for detection of differential gene expression in  
362 small microarray experiments. *Bioinformatics*. 2003;19(18):2448-55. Epub 2003/12/12. doi:  
363 10.1093/bioinformatics/btg345. PubMed PMID: 14668230.
- 364 12. Davidson NM, Oshlack A. Corset: enabling differential gene expression analysis for de novo  
365 assembled transcriptomes. *Genome Biol*. 2014;15(7):410. Epub 2014/07/27. doi: 10.1186/s13059-014-  
366 0410-6. PubMed PMID: 25063469; PubMed Central PMCID: PMC4165373.
- 367 13. Koh W, Sheng CT, Tan B, Lee QY, Kuznetsov V, Kiang LS, et al. Analysis of deep sequencing  
368 microRNA expression profile from human embryonic stem cells derived mesenchymal stem cells reveals  
369 possible role of let-7 microRNA family in downstream targeting of hepatic nuclear factor 4 alpha. *BMC*  
370 *Genomics*. 2010;11 Suppl 1:S6. Epub 2010/03/03. doi: 10.1186/1471-2164-11-S1-S6. PubMed PMID:  
371 20158877; PubMed Central PMCID: PMC2822534.
- 372 14. Mustruph A, Zanetti ME, Jang CJ, Holtan HE, Repetti PP, Galbraith DW, et al. Profiling  
373 translomes of discrete cell populations resolves altered cellular priorities during hypoxia in  
374 *Arabidopsis*. *Proc Natl Acad Sci U S A*. 2009;106(44):18843-8. Epub 2009/10/22. doi:  
375 10.1073/pnas.0906131106. PubMed PMID: 19843695; PubMed Central PMCID: PMC2764735.
- 376 15. R Core Team. R: A language and environment for statistical computing. R Foundation for  
377 Statistical Computing; 2019. Database: figshare [Internet]. Available from: <https://www.R-project.org/>.

- 378 16. Jiao X, Sherman BT, Huang da W, Stephens R, Baseler MW, Lane HC, et al. DAVID-WS: a stateful  
379 web service to facilitate gene/protein list analysis. *Bioinformatics*. 2012;28(13):1805-6. Epub  
380 2012/05/01. doi: 10.1093/bioinformatics/bts251. PubMed PMID: 22543366; PubMed Central PMCID:  
381 PMCPMC3381967.
- 382 17. Mi H, Muruganujan A, Huang X, Ebert D, Mills C, Guo X, et al. Protocol Update for large-scale  
383 genome and gene function analysis with the PANTHER classification system (v.14.0). *Nat Protoc*.  
384 2019;14(3):703-21. Epub 2019/02/26. doi: 10.1038/s41596-019-0128-8. PubMed PMID: 30804569;  
385 PubMed Central PMCID: PMCPMC6519457.
- 386 18. Chasse H, Boulben S, Costache V, Cormier P, Morales J. Analysis of translation using polysome  
387 profiling. *Nucleic Acids Res*. 2017;45(3):e15. Epub 2017/02/10. doi: 10.1093/nar/gkw907. PubMed  
388 PMID: 28180329; PubMed Central PMCID: PMCPMC5388431.
- 389 19. Marioni JC, Mason CE, Mane SM, Stephens M, Gilad Y. RNA-seq: an assessment of technical  
390 reproducibility and comparison with gene expression arrays. *Genome Res*. 2008;18(9):1509-17. Epub  
391 2008/06/14. doi: 10.1101/gr.079558.108. PubMed PMID: 18550803; PubMed Central PMCID:  
392 PMCPMC2527709.
- 393 20. McCarthy DJ, Chen Y, Smyth GK. Differential expression analysis of multifactor RNA-Seq  
394 experiments with respect to biological variation. *Nucleic Acids Res*. 2012;40(10):4288-97. Epub  
395 2012/01/31. doi: 10.1093/nar/gks042. PubMed PMID: 22287627; PubMed Central PMCID:  
396 PMCPMC3378882.
- 397 21. Anders S, Huber W. Differential expression analysis for sequence count data. *Genome Biol*.  
398 2010;11(10):R106. Epub 2010/10/29. doi: 10.1186/gb-2010-11-10-r106. PubMed PMID: 20979621;  
399 PubMed Central PMCID: PMCPMC3218662.
- 400 22. Cai W, Zhou W, Han Z, Lei J, Zhuang J, Zhu P, et al. Master regulator genes and their impact on  
401 major diseases. *PeerJ*. 2020;8:e9952. Epub 2020/10/22. doi: 10.7717/peerj.9952. PubMed PMID:  
402 33083114; PubMed Central PMCID: PMCPMC7546222.
- 403 23. Czechowski T, Bari RP, Stitt M, Scheible WR, Udvardi MK. Real-time RT-PCR profiling of over  
404 1400 Arabidopsis transcription factors: unprecedented sensitivity reveals novel root- and shoot-specific

405 genes. Plant J. 2004;38(2):366-79. Epub 2004/04/14. doi: 10.1111/j.1365-313X.2004.02051.x. PubMed  
406 PMID: 15078338.  
407 24. Schmid M, Davison TS, Henz SR, Pape UJ, Demar M, Vingron M, et al. A gene expression map of  
408 Arabidopsis thaliana development. Nat Genet. 2005;37(5):501-6. Epub 2005/04/05. doi:  
409 10.1038/ng1543. PubMed PMID: 15806101.

410

411

412 **Supporting information**

413 Excel file with gene lists

414

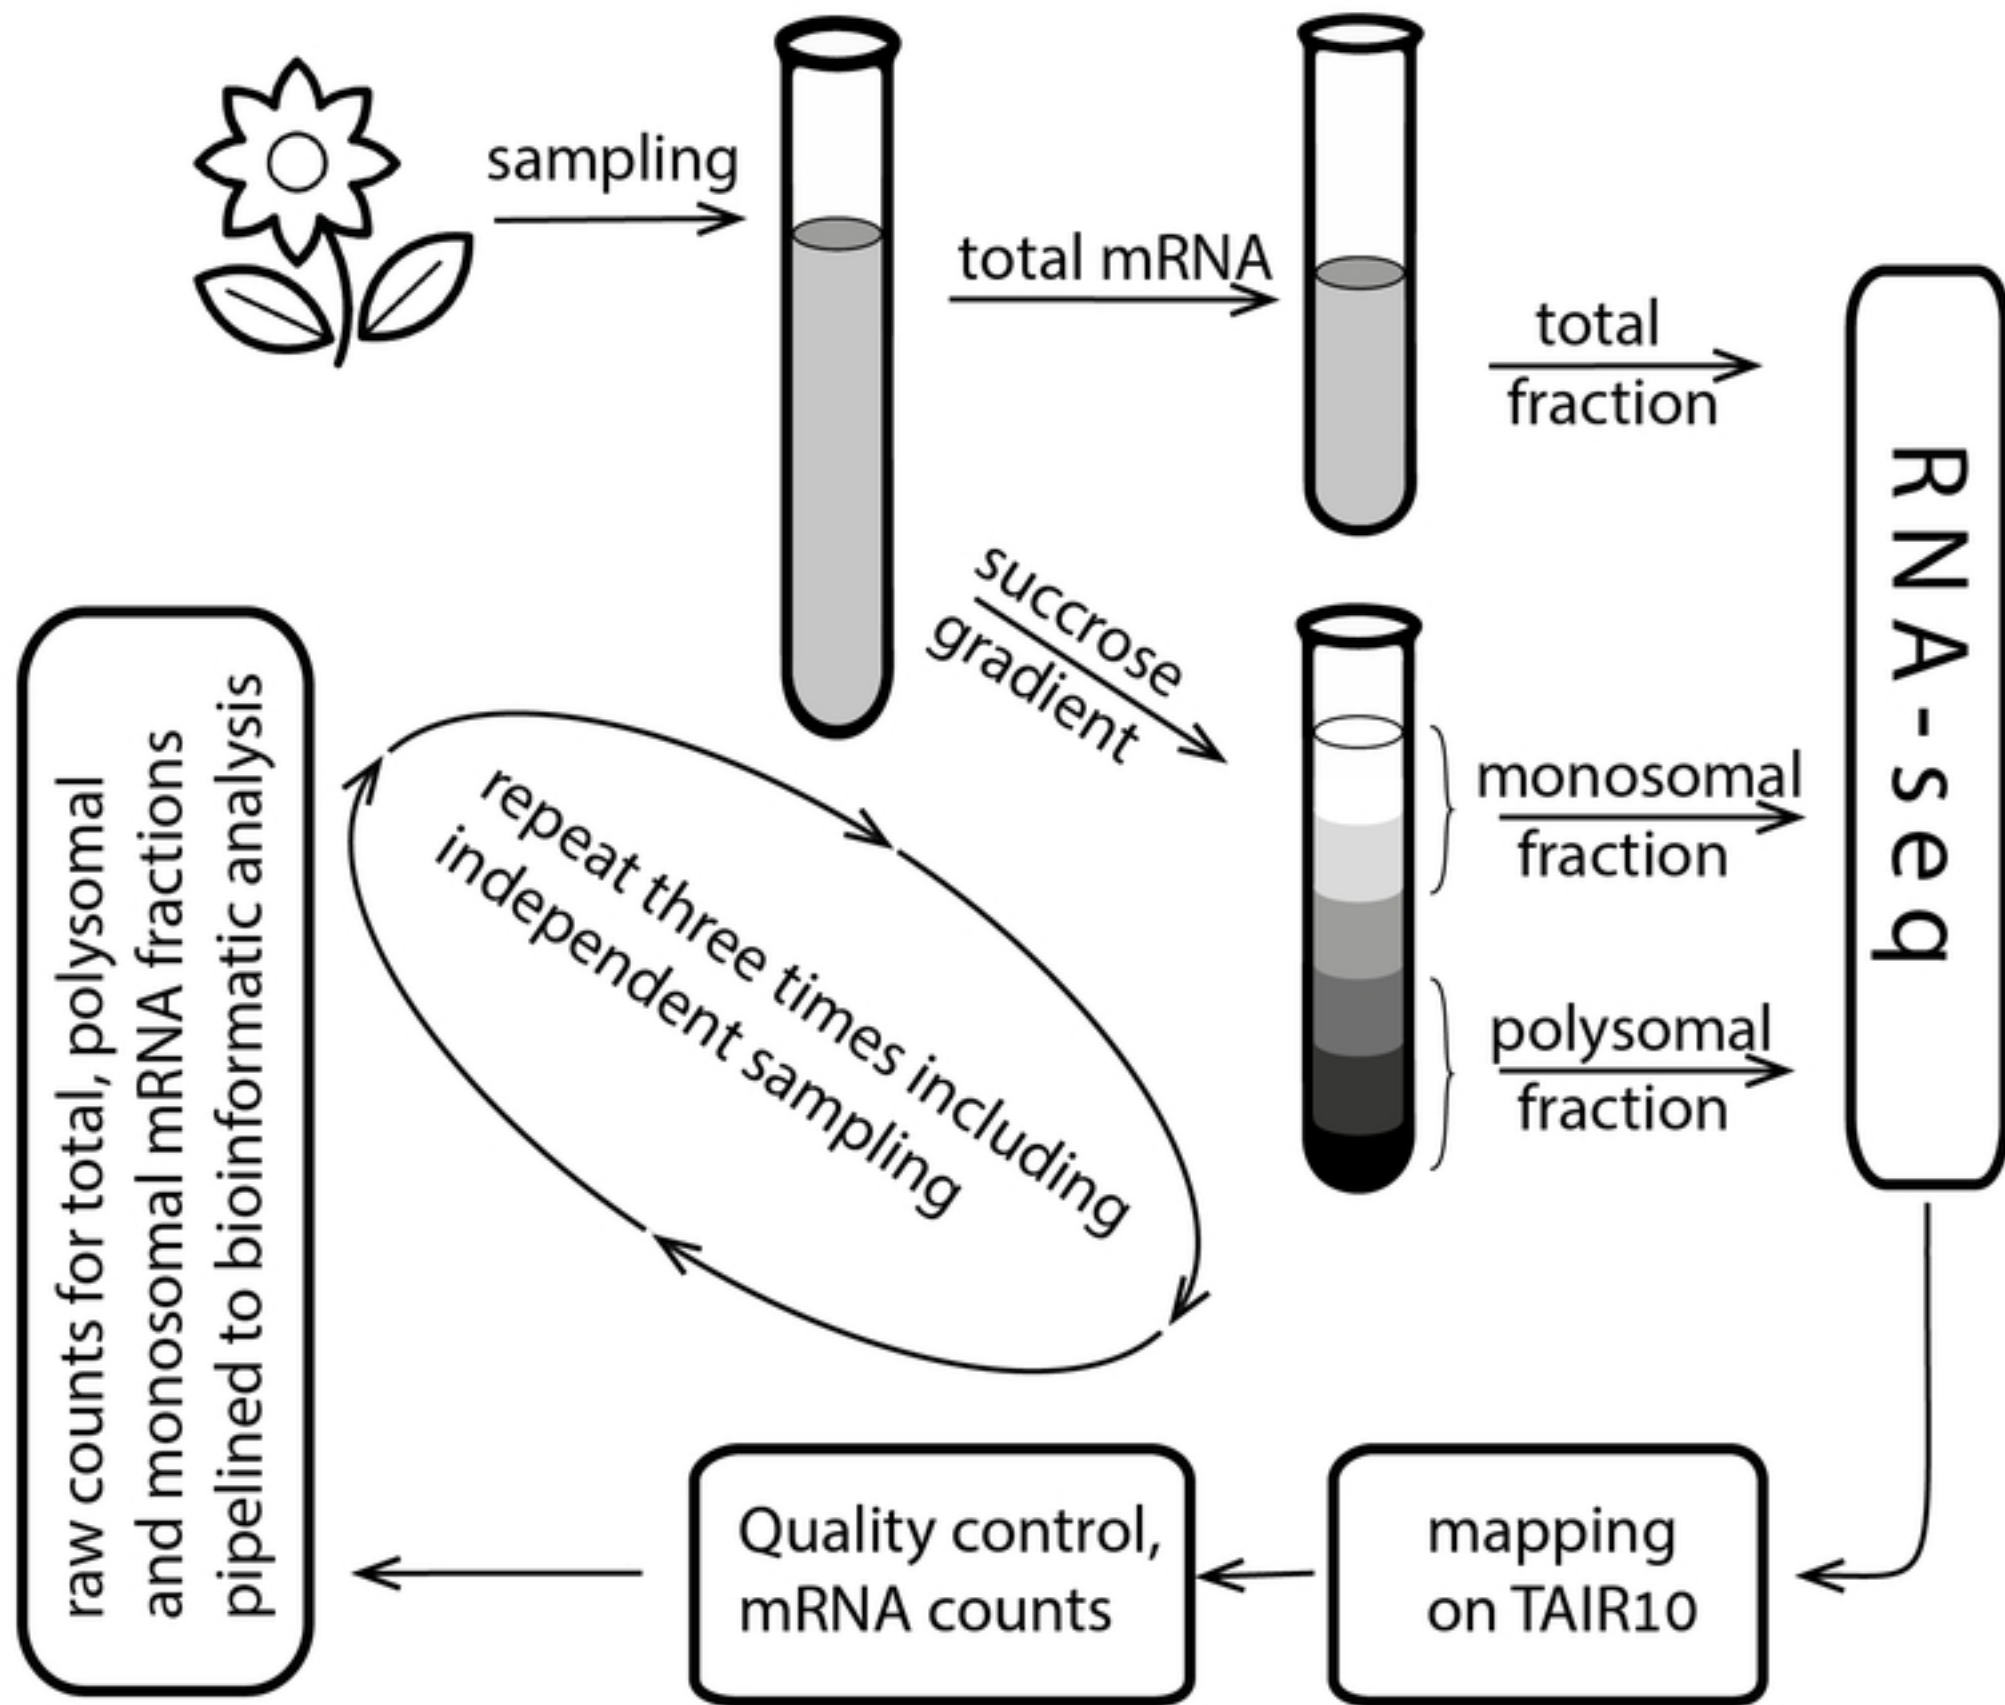

**A**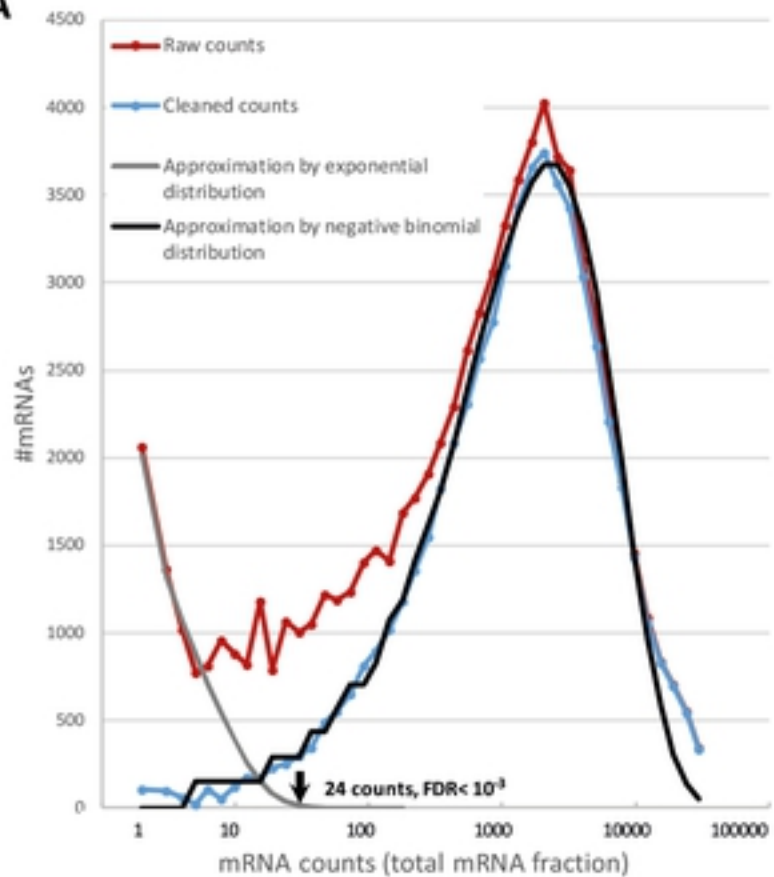**B**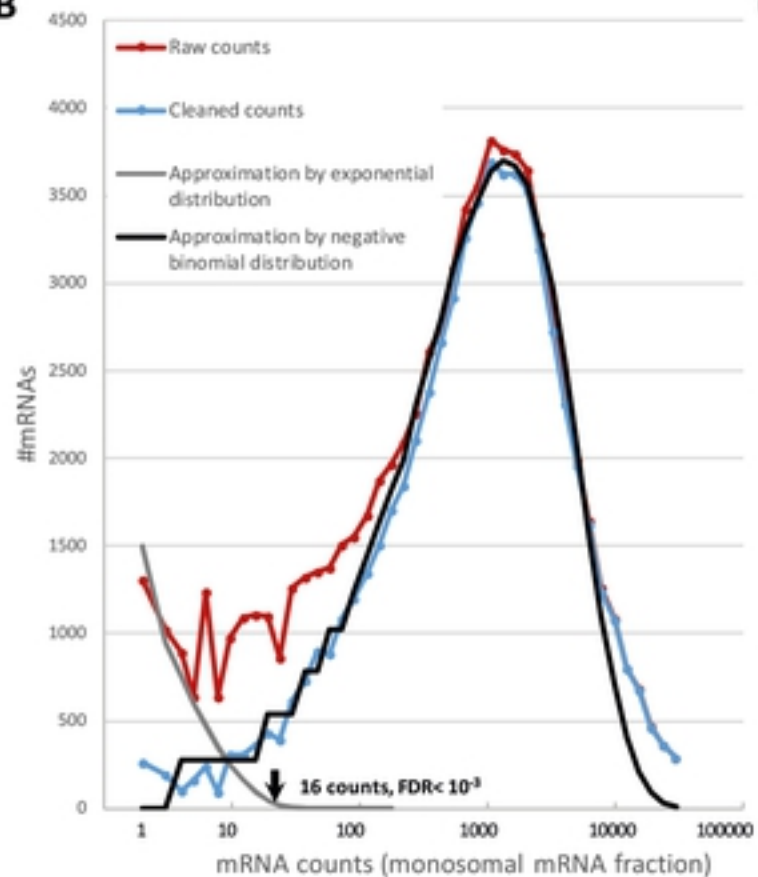**C**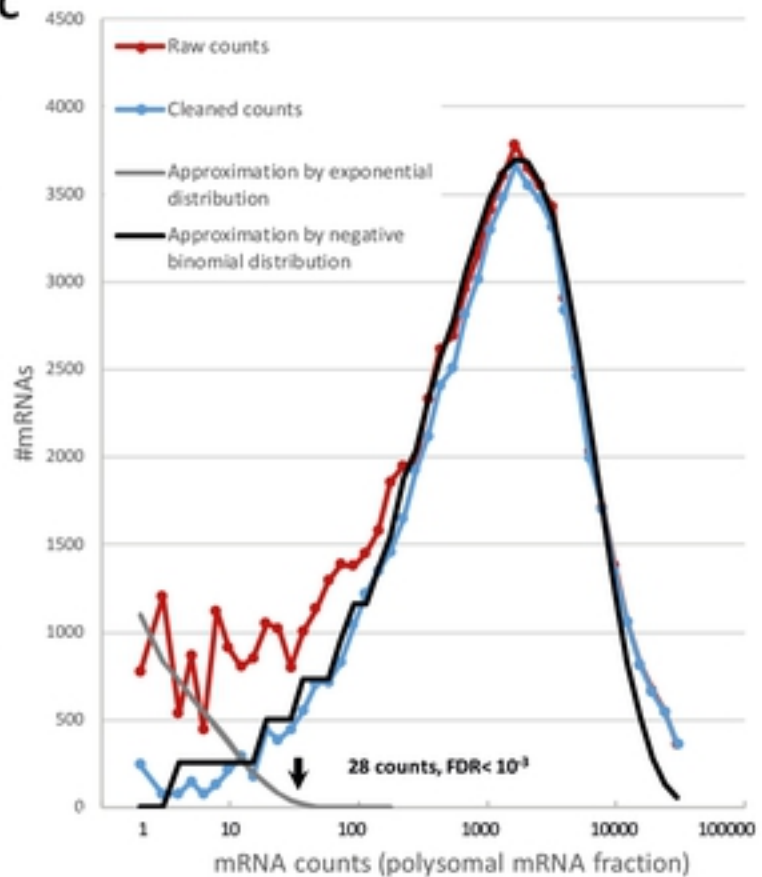

## A GO Molecular function

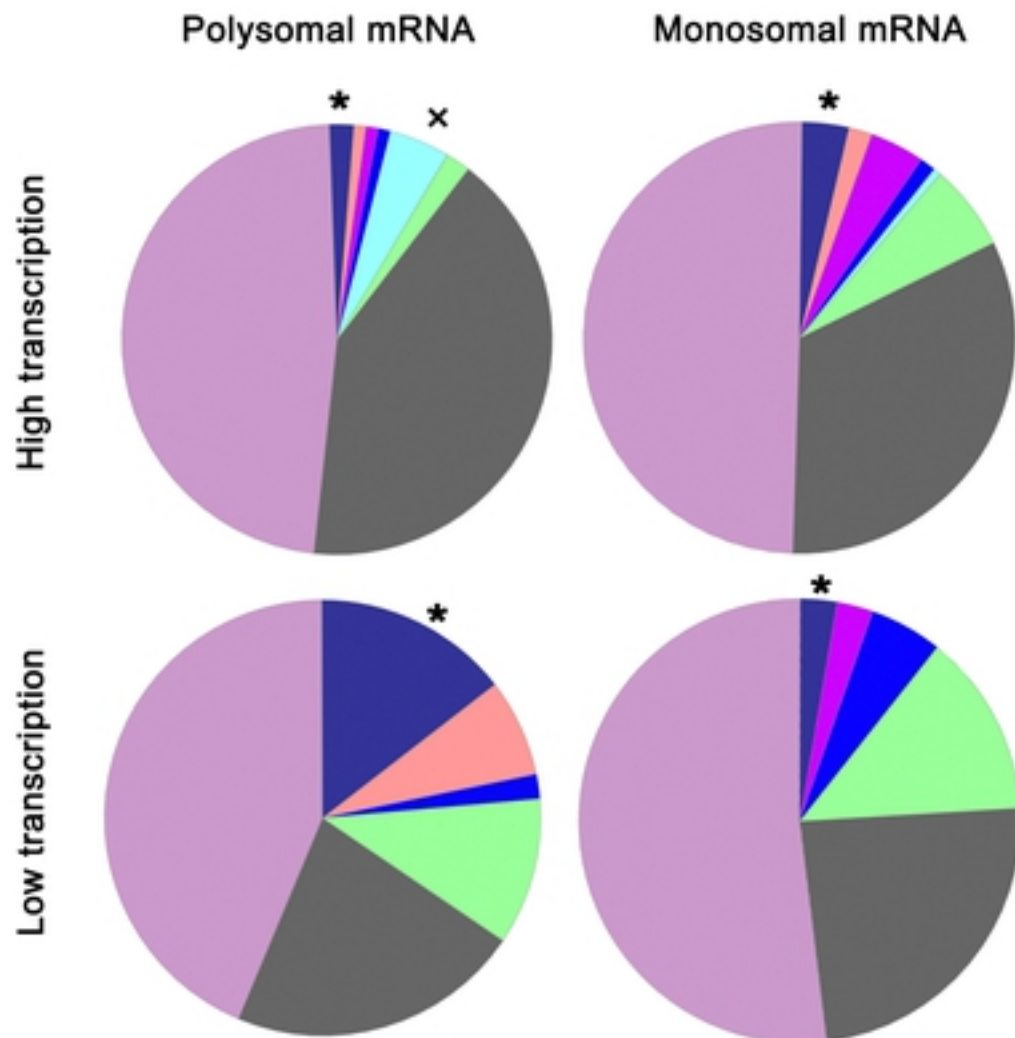

- [binding \(GO:0005488\)](#)
- [catalytic activity \(GO:0003824\)](#)
- [molecular function regulator \(GO:0098772\)](#) \*
- [molecular transducer activity \(GO:0060089\)](#)
- [structural molecule activity \(GO:0005198\)](#)
- [transcription regulator activity \(GO:0140110\)](#)
- [translation regulator activity \(GO:0045182\)](#) x
- [transporter activity \(GO:0005215\)](#)

## B Protein class

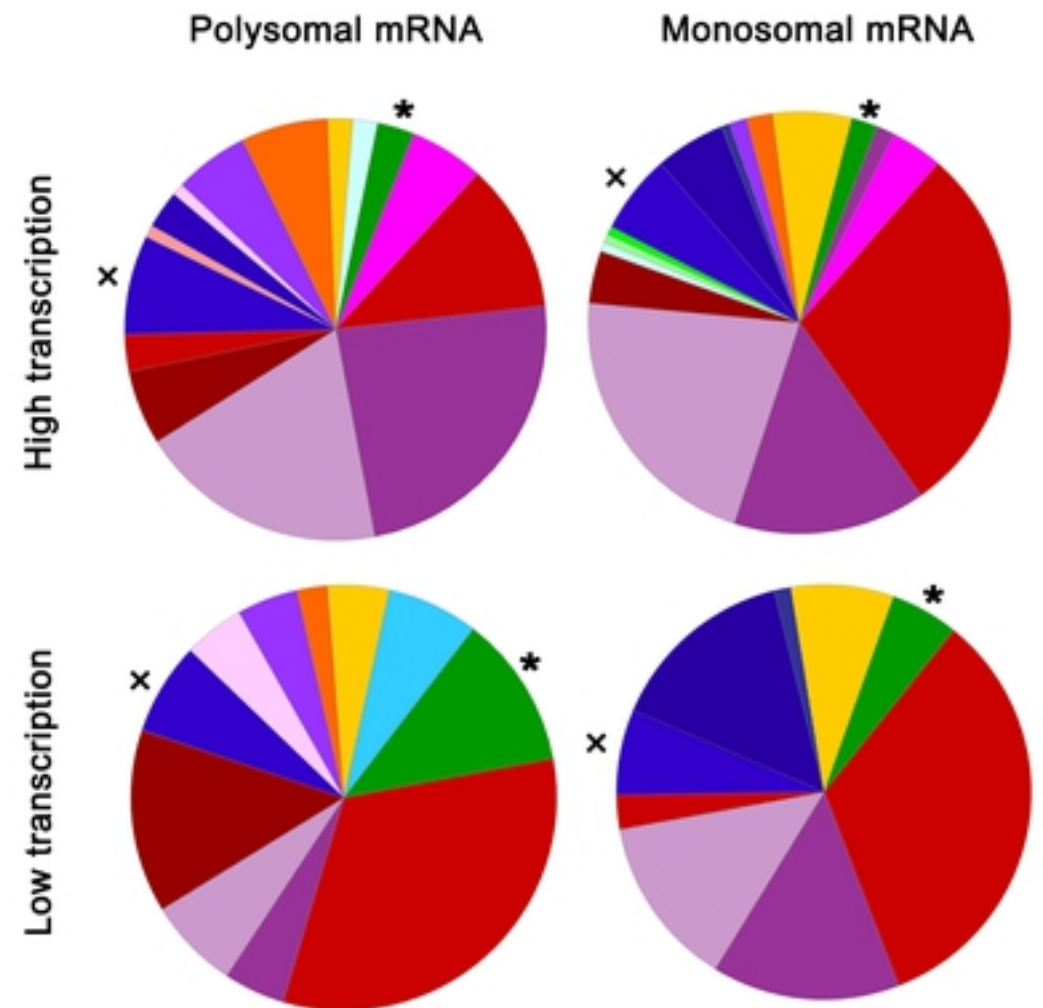

- [cell adhesion molecule \(PC00069\)](#)
- [chaperone \(PC00072\)](#)
- [chromatin/chromatin-binding, or -regulatory protein \(PC00077\)](#)
- [cytoskeletal protein \(PC00085\)](#)
- [extracellular matrix protein \(PC00102\)](#)
- [gene-specific transcriptional regulator \(PC00264\)](#) \*
- [membrane traffic protein \(PC00150\)](#)
- [metabolite interconversion enzyme \(PC00262\)](#)
- [nucleic acid binding protein \(PC00171\)](#)
- [protein modifying enzyme \(PC00260\)](#)
- [protein-binding activity modulator \(PC00095\)](#)
- [scaffold/adaptor protein \(PC00226\)](#)
- [translational protein \(PC00263\)](#) x
- [transmembrane signal receptor \(PC00197\)](#)
- [transporter \(PC00227\)](#)
- [defense/immunity protein \(PC00090\)](#)
